# Supplementary material
Source: MDPI journal article supplement (https://www.mdpi.com/2227-9717/10/1/156)
Supplement: s1 [file s1]

# Hydrogen production from biomass and organic waste using dark fermentation. An analysis of the effect of operating parameters on process performance in literature studies

Rita Noelle Moussa<sup>1</sup>, Najah Moussa<sup>2</sup>, Davide Dionisi<sup>1,\*</sup>

## Supplementary material

**Table S1.** The list of all the studies considered, with the operational parameters investigated, and analysed process parameters. CN: continuous, BA: batch.

| Waste composition                             | Operating parameters          |      |        |        |      |                         |                         | Process performance parameters            |                                                                |                          | References |
|-----------------------------------------------|-------------------------------|------|--------|--------|------|-------------------------|-------------------------|-------------------------------------------|----------------------------------------------------------------|--------------------------|------------|
|                                               | tCOD (g COD l <sup>-1</sup> ) | Mode | RT (d) | T (°C) | pH   | Substrate pre-treatment | Methanogens' inhibition | Hydrogen yield (% COD COD <sup>-1</sup> ) | Hydrogen production rate (mg l <sup>-1</sup> d <sup>-1</sup> ) | Hydrogen content (% v/v) |            |
| Sugar factory wastewater                      | 31.85                         | CN   | 0.50   | 60     | 6.80 | No                      | Yes                     | 4.98                                      | 396.60                                                         | 64.00                    | [1]        |
|                                               | 31.90                         |      | 1.00   |        |      |                         |                         | 2.72                                      | 216.40                                                         | 64.00                    |            |
|                                               | 31.90                         |      | 2.00   |        |      |                         |                         | 1.28                                      | 101.60                                                         | 64.00                    |            |
|                                               | 31.80                         |      | 3.00   |        |      |                         |                         | 0.85                                      | 67.80                                                          | 64.00                    |            |
| Soluble condensed molasses                    | 40.00                         | CN   | 1.00   | 35     | 5.50 | Yes                     | Yes                     | 1.20                                      | 60.00                                                          | 35.20                    | [2]        |
|                                               |                               |      | 0.50   |        |      |                         |                         | 3.06                                      | 306.00                                                         | 47.00                    |            |
|                                               |                               |      | 0.33   |        |      |                         |                         | 2.52                                      | 378.00                                                         | 47.70                    |            |
|                                               |                               |      | 0.25   |        |      |                         |                         | 2.97                                      | 594.00                                                         | 47.80                    |            |
|                                               |                               |      | 0.17   |        |      |                         |                         | 2.21                                      | 664.00                                                         | 50.20                    |            |
|                                               |                               |      | 0.13   |        |      |                         |                         | 1.95                                      | 780.00                                                         | 51.70                    |            |
| Molasses from a Local sugar refining industry | 2.47                          | CN   | 0.48   | 35     | 4.50 | No                      | No                      | 0.65                                      | 4.22                                                           | 50.00                    | [3]        |

| Waste composition                        | Operating parameters          |      |        |        |      |                         |                         | Process performance parameters            |                                                                |                          | References |
|------------------------------------------|-------------------------------|------|--------|--------|------|-------------------------|-------------------------|-------------------------------------------|----------------------------------------------------------------|--------------------------|------------|
|                                          | tCOD (g COD l <sup>-1</sup> ) | Mode | RT (d) | T (°C) | pH   | Substrate pre-treatment | Methanogens' inhibition | Hydrogen yield (% COD COD <sup>-1</sup> ) | Hydrogen production rate (mg l <sup>-1</sup> d <sup>-1</sup> ) | Hydrogen content (% v/v) |            |
| Molasses – Local sugar refining industry | 5.47                          | CN   | 0.44   | 35     | 4.50 | No                      | No                      | 5.98                                      | 93.48                                                          | 49.00                    | [3]        |
|                                          | 5.21                          |      | 0.33   |        |      |                         |                         | 6.45                                      | 126.06                                                         | 52.00                    |            |
|                                          | 5.47                          |      | 0.25   |        |      |                         |                         | 6.62                                      | 181.08                                                         | 52.00                    |            |
|                                          | 6.08                          | CN   | 0.17   | 35     | 4.50 | No                      | No                      | 8.00                                      | 364.82                                                         | 52.00                    |            |
|                                          | 6.25                          |      |        |        |      |                         |                         | 7.04                                      | 330.10                                                         | 52.00                    |            |
|                                          | 8.33                          |      |        |        |      |                         |                         | 6.44                                      | 402.21                                                         | 52.00                    |            |
|                                          | 9.72                          |      |        |        |      |                         |                         | 5.267                                     | 384.05                                                         | 52.00                    |            |
|                                          | 11.63                         |      |        |        |      |                         |                         | 5.88                                      | 513.19                                                         | 52.00                    |            |
|                                          | 13.02                         |      |        |        |      |                         |                         | 4.52                                      | 441.28                                                         | 52.00                    |            |
|                                          | 14.41                         |      |        |        |      |                         |                         | 0.04                                      | 4.67                                                           | 52.00                    |            |
| Rice winery wastewaters                  | 34.00                         | CN   | 0.08   | 35     | 5.50 | No                      | Yes                     | 1.16                                      | 590.90                                                         | 61.00                    | [4]        |
|                                          |                               |      | 0.25   |        |      |                         |                         | 1.20                                      | 203.76                                                         | 61.00                    |            |
|                                          |                               |      | 0.50   |        |      |                         |                         | 1.33                                      | 113.20                                                         | 61.00                    |            |
|                                          |                               |      | 1.00   |        |      |                         |                         | 1.42                                      | 60.56                                                          | 61.00                    |            |
|                                          | 14.00                         | CN   | 0.08   | 35     | 5.50 | No                      | Yes                     | 1.27                                      | 265.69                                                         | 61.00                    |            |
|                                          | 25.00                         |      |        |        |      |                         |                         | 1.21                                      | 454.46                                                         | 61.00                    |            |
|                                          | 36.00                         |      |        |        |      |                         |                         | 1.20                                      | 647.24                                                         | 61.00                    |            |
|                                          | 34.00                         | CN   | 0.08   | 35     | 4.50 | No                      | Yes                     | 0.92                                      | 48.65                                                          | 61.00                    |            |
|                                          |                               |      |        |        |      |                         |                         | 0.99                                      | 502.61                                                         | 61.00                    |            |
|                                          |                               |      |        |        |      |                         |                         | 1.17                                      | 597.70                                                         | 61.00                    |            |
|                                          |                               |      |        |        |      |                         |                         | 1.00                                      | 509.40                                                         | 61.00                    |            |
|                                          | 34.00                         | CN   | 0.08   | 20     | 6.00 | No                      | Yes                     | 0.92                                      | 468.65                                                         | 61.00                    |            |
|                                          |                               |      |        |        |      |                         |                         | 1.05                                      | 536.57                                                         | 61.00                    |            |
|                                          |                               |      |        |        |      |                         |                         | 1.17                                      | 597.70                                                         | 61.00                    |            |
|                                          |                               |      |        |        |      |                         |                         | 1.00                                      | 509.40                                                         | 61.00                    |            |
| Glucose                                  | 21.17                         | CN   | 2.00   | 35     | 5.70 | No                      | Yes                     | 5.03                                      | 66.60                                                          | 48.80                    | [5]        |
|                                          |                               |      | 1.50   |        |      |                         |                         | 8.18                                      | 143.60                                                         | 49.30                    |            |

| Waste composition                           | Operating parameters             |      |        |           |      |                                |                            | Process performance parameters               |                                                                      |                                | References |
|---------------------------------------------|----------------------------------|------|--------|-----------|------|--------------------------------|----------------------------|----------------------------------------------|----------------------------------------------------------------------|--------------------------------|------------|
|                                             | tCOD<br>(g COD l <sup>-1</sup> ) | Mode | RT (d) | T<br>(°C) | pH   | Substrate<br>pre-<br>treatment | Methanogens'<br>inhibition | Hydrogen yield<br>(% COD COD <sup>-1</sup> ) | Hydrogen<br>production rate<br>(mg l <sup>-1</sup> d <sup>-1</sup> ) | Hydrogen<br>content<br>(% v/v) |            |
| Glucose                                     | 21.17                            | CN   | 1.00   | 35        | 5.70 | No                             | Yes                        | 7.86                                         | 208.00                                                               | 44.20                          | [5]        |
|                                             |                                  |      | 0.50   |           |      |                                |                            | 13.83                                        | 732.00                                                               | 45.30                          |            |
|                                             |                                  |      | 0.25   |           |      |                                |                            | 13.43                                        | 1422.00                                                              | 43.10                          |            |
| Glucose                                     | 21.17                            | CN   | 2.00   | 35        | 6.40 | No                             | No                         | 7.07                                         | 93.60                                                                | 53.30                          |            |
|                                             |                                  |      | 1.50   |           |      |                                |                            | 8.33                                         | 146.20                                                               | 51.70                          |            |
|                                             |                                  |      | 1.00   |           |      |                                |                            | 9.52                                         | 252.00                                                               | 49.40                          |            |
|                                             |                                  |      | 0.50   |           |      |                                |                            | 13.38                                        | 708.00                                                               | 46.60                          |            |
|                                             |                                  |      | 0.25   |           |      |                                |                            | 10.84                                        | 1148.00                                                              | 43.80                          |            |
| Glucose                                     | 53.35                            | BA   | 8.00   | 55        | 7.00 | No                             | No                         | 5.55                                         | 46.23                                                                | -                              |            |
|                                             | 5.34                             | CN   | 0.33   | 30        | 6.70 |                                |                            | 18.22                                        | 7.59                                                                 | -                              | [6]        |
|                                             | 10.67                            |      | 0.33   |           |      |                                |                            | 15.84                                        | 13.21                                                                | -                              | [7]        |
| Starch                                      | 5.20                             | BA   | 8.33   | 55        | 5.00 | No                             | Yes                        | 0.39                                         | 0.30                                                                 | 60.00                          |            |
|                                             |                                  |      |        |           | 6.00 |                                |                            | 0.97                                         | 0.75                                                                 | 60.00                          |            |
|                                             |                                  |      |        |           | 7.00 |                                |                            | 0.70                                         | 0.55                                                                 | 60.00                          |            |
|                                             |                                  |      |        |           | 8.00 |                                |                            | 0.63                                         | 0.49                                                                 | 60.00                          |            |
|                                             |                                  |      |        |           | 9.00 |                                |                            | 0.52                                         | 0.40                                                                 | 60.00                          |            |
|                                             | 10.40                            | BA   | 8.33   | 55        | 6.00 | No                             | Yes                        | 0.70                                         | 1.10                                                                 | 60.00                          |            |
|                                             | 20.68                            |      |        |           |      |                                |                            | 0.52                                         | 1.60                                                                 | 60.00                          |            |
|                                             | 31.08                            |      |        |           |      |                                |                            | 0.42                                         | 1.96                                                                 | 60.00                          |            |
|                                             | 41.36                            |      |        |           |      |                                |                            | 0.25                                         | 1.57                                                                 | 60.00                          |            |
|                                             | 5.20                             | BA   | 8.33   | 37        | 7.00 | No                             | Yes                        | 0.49                                         | 0.39                                                                 | 60.00                          |            |
|                                             |                                  |      |        | 55        |      |                                |                            | 0.82                                         | 0.64                                                                 | 60.00                          |            |
|                                             |                                  |      |        |           |      |                                |                            |                                              |                                                                      |                                |            |
| Coffee drink<br>manufacturing<br>wastewater | 20.00                            | CN   | 0.50   | 35        | 8.00 | No                             | Yes                        | 1.34                                         | 66.75                                                                | -                              | [9]        |
|                                             |                                  |      | 0.33   |           |      |                                |                            | 2.67                                         | 199.875                                                              | -                              |            |

| Waste composition                     | Operating parameters          |      |        |        |      |                         |                         | Process performance parameters            |                                                                |                          | References |
|---------------------------------------|-------------------------------|------|--------|--------|------|-------------------------|-------------------------|-------------------------------------------|----------------------------------------------------------------|--------------------------|------------|
|                                       | tCOD (g COD l <sup>-1</sup> ) | Mode | RT (d) | T (°C) | pH   | Substrate pre-treatment | Methanogens' inhibition | Hydrogen yield (% COD COD <sup>-1</sup> ) | Hydrogen production rate (mg l <sup>-1</sup> d <sup>-1</sup> ) | Hydrogen content (% v/v) |            |
| Coffee drink manufacturing wastewater | 20.00                         | CN   | 0.25   | 35     | 8.00 | No                      | Yes                     | 1.67                                      | 166.50                                                         | -                        | [9]        |
|                                       |                               |      | 0.33   |        | 5.50 |                         |                         | 1.75                                      | 131.25                                                         | -                        |            |
|                                       |                               |      | 0.25   |        |      |                         |                         | 10.75                                     | 1074.50                                                        | -                        |            |
|                                       |                               |      | 0.17   |        |      |                         |                         | 8.00                                      | 1199.25                                                        | -                        |            |
|                                       |                               |      | 0.25   |        |      |                         |                         | 10.83                                     | 1083.00                                                        | -                        |            |
| Sucrose-rich synthetic wastewater     | 4.06                          | CN   | 0.54   | 39     | 3.40 | No                      | No                      | 12.36                                     | 115.68                                                         | -                        | [10]       |
|                                       |                               |      |        |        | 3.80 |                         |                         | 17.15                                     | 160.54                                                         | -                        |            |
|                                       |                               |      |        |        | 4.20 |                         |                         | 29.00                                     | 271.49                                                         | -                        |            |
|                                       |                               |      |        |        | 4.80 |                         |                         | 21.94                                     | 205.40                                                         | -                        |            |
|                                       |                               |      |        |        | 5.30 |                         |                         | 20.67                                     | 193.59                                                         | -                        |            |
|                                       |                               |      |        |        | 5.70 |                         |                         | 20.67                                     | 193.59                                                         | -                        |            |
|                                       |                               |      |        |        | 6.30 |                         |                         | 18.15                                     | 169.98                                                         | -                        |            |
|                                       |                               |      |        |        |      |                         |                         | 11.10                                     | 98.70                                                          | 56.60                    |            |
|                                       | 5.33                          | CN   | 0.75   | 38     | 4.50 | No                      | Yes                     | 8.62                                      | 241.86                                                         | -                        | [11]       |
|                                       | 22.43                         |      | 1.00   | 35     | 6.70 |                         |                         | 13.01                                     | 440.32                                                         | -                        |            |
|                                       | 22.56                         |      | 0.83   |        |      |                         |                         | 12.83                                     | 545.74                                                         | -                        |            |
|                                       | 22.69                         |      | 0.67   |        |      |                         |                         | 7.45                                      | 421.7                                                          | -                        |            |
|                                       | 22.63                         |      | 0.50   |        |      |                         |                         | 5.04                                      | 341.08                                                         | -                        |            |
|                                       | 22.56                         |      | 0.42   |        |      |                         |                         | 2.64                                      | 223.26                                                         | 42.40                    |            |
|                                       |                               |      | 0.33   |        |      |                         |                         | 1.70                                      | 192.24                                                         | -                        |            |
|                                       | 22.63                         |      | 0.25   |        |      |                         |                         | 0.22                                      | 37.20                                                          | -                        |            |
|                                       | 5.33                          | CN   | 0.75   | 38     | 4.40 | No                      | No                      | 11.90                                     | 98.42                                                          | -                        | [13]       |
|                                       | 8.00                          |      |        |        |      |                         |                         | 9.16                                      | 110.86                                                         | -                        |            |
|                                       | 10.67                         |      |        |        |      |                         |                         | 8.74                                      | 139.23                                                         | -                        |            |
|                                       |                               |      |        |        |      |                         |                         |                                           |                                                                |                          |            |
|                                       | 19.65                         |      |        |        |      |                         |                         | 8.74                                      | 252.82                                                         | -                        |            |

| Waste composition                                 | Operating parameters          |      |        |        |      |                         |                         | Process performance parameters            |                                                                |                          | References |
|---------------------------------------------------|-------------------------------|------|--------|--------|------|-------------------------|-------------------------|-------------------------------------------|----------------------------------------------------------------|--------------------------|------------|
|                                                   | tCOD (g COD l <sup>-1</sup> ) | Mode | RT (d) | T (°C) | pH   | Substrate pre-treatment | Methanogens' inhibition | Hydrogen yield (% COD COD <sup>-1</sup> ) | Hydrogen production rate (mg l <sup>-1</sup> d <sup>-1</sup> ) | Hydrogen content (% v/v) |            |
| Sucrose-rich synthetic wastewater                 | 22.45                         | CN   | 0.75   | 38     | 4.40 | No                      | No                      | 8.57                                      | 284.33                                                         | -                        | [13]       |
|                                                   | 28.07                         |      |        |        |      |                         |                         | 8.74                                      | 356.92                                                         | -                        |            |
|                                                   | 10.67                         |      | 0.13   |        |      |                         |                         | 4.08                                      | 93.72                                                          | -                        |            |
|                                                   |                               |      | 0.25   |        |      |                         |                         | 6.16                                      | 103.70                                                         | -                        |            |
|                                                   |                               |      | 0.42   |        |      |                         |                         | 7.74                                      | 139.44                                                         | -                        |            |
|                                                   |                               |      | 0.58   |        |      |                         |                         | 8.41                                      | 259.70                                                         | -                        |            |
|                                                   |                               |      | 0.92   |        |      |                         |                         | 8.24                                      | 285.80                                                         | -                        |            |
|                                                   |                               |      | 1.25   |        |      |                         |                         | 6.58                                      | 363.76                                                         | -                        |            |
| Bean curd manufacturing process – Municipal waste | 12.25                         | CN   | 0.42   | 35     | 5.00 | No                      | No                      | 2.70                                      | 99.17                                                          | -                        | [14]       |
| Rice bran – Municipal waste                       | 8.82                          |      |        |        |      |                         |                         | 8.25                                      | 218.21                                                         | 68.00                    |            |
| Wheat bran – Municipal waste                      | 10.65                         |      |        |        |      |                         |                         | 9.82                                      | 313.70                                                         | 72.00                    |            |
| Glucose                                           | 4.85                          |      |        |        |      |                         |                         |                                           |                                                                |                          |            |
| Oat straw hydrolysate                             | 1.20                          | CN   | 1.00   | 28     | 5.50 | Yes                     | Yes                     | 20.56                                     | 2.77                                                           | 20.60                    | [15]       |
|                                                   | 4.32                          |      |        |        |      |                         |                         | 11.82                                     | 2.05                                                           | 9.50                     |            |
|                                                   | 14.88                         |      |        |        |      |                         |                         | 15.56                                     | 2.70                                                           | 15.60                    |            |
|                                                   |                               |      |        |        |      |                         |                         | 9.91                                      | 14.86                                                          | -                        |            |
|                                                   |                               |      |        |        |      |                         |                         | 4.13                                      | 22.29                                                          | 47.00                    |            |
|                                                   |                               |      |        |        |      |                         |                         | 1.199                                     | 22.29                                                          | 47.00                    |            |
|                                                   | 35.04                         |      | 0.50   |        |      |                         |                         | 0.59                                      | 52.02                                                          | 36.50                    | [16]       |
|                                                   | 34.98                         |      | 0.25   |        |      |                         |                         | 0.25                                      | 44.59                                                          | -                        |            |

| Waste composition | Operating parameters        |      |        |        |       |                         |                         | Process performance parameters            |                                                                |                          | References |
|-------------------|-----------------------------|------|--------|--------|-------|-------------------------|-------------------------|-------------------------------------------|----------------------------------------------------------------|--------------------------|------------|
|                   | tCOD (g COD <sup>-1</sup> ) | Mode | RT (d) | T (°C) | pH    | Substrate pre-treatment | Methanogens' inhibition | Hydrogen yield (% COD COD <sup>-1</sup> ) | Hydrogen production rate (mg l <sup>-1</sup> d <sup>-1</sup> ) | Hydrogen content (% v/v) |            |
| Diluted molasses  | 5.00                        | BA   | 55.00  | 35     | 4.40  | No                      | No                      | 8.22                                      | 0.93                                                           | 54.00                    | [17]       |
| Molasses          | 20.00                       | BA   | 3.00   | 35     | 3.00  |                         |                         | 3.16                                      | 26.36                                                          | -                        | [18]       |
|                   |                             |      |        |        | 4.00  |                         |                         | 2.30                                      | 19.18                                                          | -                        |            |
|                   |                             |      |        |        | 5.00  |                         |                         | 1.34                                      | 11.17                                                          | -                        |            |
|                   |                             |      |        |        | 6.81  |                         |                         | 0.53                                      | 4.38                                                           | -                        |            |
|                   |                             |      |        |        | 10.00 |                         |                         | 1.83                                      | 15.26                                                          | -                        |            |
|                   |                             |      |        |        | 11.00 |                         |                         | 0.38                                      | 3.16                                                           | -                        |            |
|                   |                             |      |        |        | 12.00 |                         |                         | 0.78                                      | 6.49                                                           | -                        |            |
| Starch            | 4.52                        | CN   | 0.17   | 30     | 4.50  | No                      | No                      | 4.95                                      | 16.78                                                          | 40.97                    | [19]       |
|                   | 9.04                        |      | 0.33   |        |       |                         |                         | 4.31                                      | 14.60                                                          | 50.17                    |            |
|                   | 18.08                       |      | 0.67   |        |       |                         |                         | 3.21                                      | 10.90                                                          | 41.86                    |            |
|                   | 9.04                        |      |        |        |       |                         |                         | 4.89                                      | 8.28                                                           | 56.99                    |            |
|                   | 4.52                        |      | 0.33   |        |       |                         |                         | 7.07                                      | 11.99                                                          | 60.55                    |            |
|                   | 2.26                        |      | 0.17   |        |       |                         |                         | 4.95                                      | 8.39                                                           | 34.45                    |            |
|                   |                             |      | 0.33   |        |       |                         |                         | 4.89                                      | 4.14                                                           | 54.62                    |            |
|                   | 4.52                        |      | 0.67   |        |       |                         |                         | 6.04                                      | 5.12                                                           | 50.47                    |            |
|                   | 2.26                        |      |        |        |       |                         |                         | 5.53                                      | 2.34                                                           | 49.28                    |            |
|                   | 3.39                        |      | 1.00   |        |       |                         |                         | 6.04                                      | 2.56                                                           | 47.20                    |            |
| Waste sludge      | 19.50                       | BA   | 0.67   | 35     | 7.90  | No                      | Yes                     | 5.93                                      | 216.75                                                         | -                        | [20]       |
|                   |                             |      |        |        |       | Yes                     | Yes                     | 6.67                                      | 243.84                                                         | -                        |            |
|                   |                             |      |        |        |       |                         |                         | 5.55                                      | 202.88                                                         | -                        |            |
|                   |                             |      |        |        |       |                         |                         | 5.96                                      | 218.02                                                         | -                        |            |

| Operating parameters |                                                                                    |      |        |        |      |                         |                         | Process performance parameters            |                                                                |                          | References |      |    |      |     |     |       |        |       |      |
|----------------------|------------------------------------------------------------------------------------|------|--------|--------|------|-------------------------|-------------------------|-------------------------------------------|----------------------------------------------------------------|--------------------------|------------|------|----|------|-----|-----|-------|--------|-------|------|
| Waste composition    | tCOD (g COD-1)                                                                     | Mode | RT (d) | T (°C) | pH   | Substrate pre-treatment | Methanogens' inhibition | Hydrogen yield (% COD COD <sup>-1</sup> ) | Hydrogen production rate (mg l <sup>-1</sup> d <sup>-1</sup> ) | Hydrogen content (% v/v) |            |      |    |      |     |     |       |        |       |      |
| Corn starch          | 20.00                                                                              | CN   | 0.75   | 35     | 5.30 | Yes                     | Yes                     | 3.56                                      | 118.64                                                         | 60.00                    | [21]       |      |    |      |     |     |       |        |       |      |
|                      |                                                                                    |      | 0.63   |        |      |                         |                         | 5.44                                      | 217.50                                                         | 60.00                    |            |      |    |      |     |     |       |        |       |      |
|                      |                                                                                    |      | 0.50   |        |      |                         |                         | 7.12                                      | 355.92                                                         | 60.00                    |            |      |    |      |     |     |       |        |       |      |
|                      |                                                                                    |      | 0.38   |        |      |                         |                         | 5.34                                      | 355.92                                                         | 65.00                    |            |      |    |      |     |     |       |        |       |      |
|                      |                                                                                    |      | 0.25   |        |      |                         |                         | 3.95                                      | 395.46                                                         | 65.00                    |            |      |    |      |     |     |       |        |       |      |
|                      |                                                                                    |      | 0.17   |        |      |                         |                         | 2.11                                      | 316.37                                                         | 50.00                    |            |      |    |      |     |     |       |        |       |      |
| Raw starch           | 20.00                                                                              | BA   | 40.00  | 37     | 7.50 | Yes                     | Yes                     | 1.67                                      | 1.042                                                          | -                        | [22]       |      |    |      |     |     |       |        |       |      |
| Starch               | 26.70                                                                              |      |        |        |      |                         | No                      | 1.87                                      | 1.56                                                           | -                        |            |      |    |      |     |     |       |        |       |      |
| hydrolysate          | 29.10                                                                              | CN   | 0.50   | 37     | 5.80 | Yes                     | Yes                     | 16.90                                     | 48.27                                                          | 50.00                    |            |      |    |      |     |     |       |        |       |      |
|                      |                                                                                    |      | 0.25   |        |      |                         |                         | 13.68                                     | 78.17                                                          | 50.00                    |            |      |    |      |     |     |       |        |       |      |
|                      |                                                                                    |      | 0.17   |        |      |                         |                         | 11.74                                     | 100.66                                                         | 50.00                    |            |      |    |      |     |     |       |        |       |      |
|                      |                                                                                    |      | 0.08   |        |      |                         |                         | 12.40                                     | 212.56                                                         | 50.00                    |            |      |    |      |     |     |       |        |       |      |
| Corn                 | 3.00<br>5.00<br>10.00<br>25.00<br>50.00<br>3.00<br>5.00<br>10.00<br>25.00<br>50.00 | BA   | 3.13   | 35     | 5.50 | Yes                     | Yes                     | 13.94                                     | 16.73                                                          | -                        | [23]       |      |    |      |     |     |       |        |       |      |
|                      |                                                                                    |      |        |        |      |                         |                         | 20.34                                     | 40.69                                                          | -                        |            |      |    |      |     |     |       |        |       |      |
|                      |                                                                                    |      |        |        |      |                         |                         | 18.06                                     | 72.25                                                          | -                        |            |      |    |      |     |     |       |        |       |      |
|                      |                                                                                    |      |        |        |      |                         |                         | 18.13                                     | 181.25                                                         | -                        |            |      |    |      |     |     |       |        |       |      |
|                      |                                                                                    |      |        |        |      |                         |                         | 16.10                                     | 321.94                                                         | -                        |            |      |    |      |     |     |       |        |       |      |
|                      |                                                                                    |      |        |        |      |                         |                         | 17.43                                     | 20.91                                                          | -                        |            |      |    |      |     |     |       |        |       |      |
|                      |                                                                                    |      |        |        |      |                         |                         | 18.32                                     | 36.63                                                          | -                        |            |      |    |      |     |     |       |        |       |      |
|                      |                                                                                    |      |        |        |      |                         |                         | 7.29                                      | 29.15                                                          | -                        |            |      |    |      |     |     |       |        |       |      |
|                      |                                                                                    |      |        |        |      |                         |                         | 7.29                                      | 72.88                                                          | -                        |            |      |    |      |     |     |       |        |       |      |
|                      |                                                                                    |      |        |        |      |                         |                         | 16.10                                     | 321.94                                                         | -                        |            |      |    |      |     |     |       |        |       |      |
|                      |                                                                                    |      |        |        |      |                         |                         | Sugarcane                                 | 20.00                                                          | BA                       |            | 2.50 | 37 | 5.50 | Yes | Yes | 13.70 | 137.05 | 45.00 | [24] |
|                      |                                                                                    |      |        |        |      |                         |                         |                                           |                                                                |                          |            |      |    |      |     |     | 6.00  | 95.85  | 45.00 |      |
|                      |                                                                                    |      |        |        |      |                         |                         |                                           |                                                                |                          |            |      |    |      |     |     | 6.50  | 86.35  | 45.00 |      |
|                      |                                                                                    |      |        |        |      |                         |                         |                                           |                                                                |                          |            |      |    |      |     |     | 7.00  | 84.76  | 45.00 |      |
|                      |                                                                                    |      |        |        |      |                         |                         |                                           |                                                                |                          |            |      |    |      |     |     | 8.00  | 59.41  | 44.00 |      |

| Operating parameters |                             |      |        |        |      |                         |                         | Process performance parameters            |                                                                |                          | References |
|----------------------|-----------------------------|------|--------|--------|------|-------------------------|-------------------------|-------------------------------------------|----------------------------------------------------------------|--------------------------|------------|
| Waste composition    | tCOD (g COD <sup>-1</sup> ) | Mode | RT (d) | T (°C) | pH   | Substrate pre-treatment | Methanogens' inhibition | Hydrogen yield (% COD COD <sup>-1</sup> ) | Hydrogen production rate (mg l <sup>-1</sup> d <sup>-1</sup> ) | Hydrogen content (% v/v) |            |
| Sugarcane            | 1.50                        | BA   | 2.50   | 37     | 5.50 | Yes                     | Yes                     | 11.57                                     | 8.67                                                           | 43.00                    | [24]       |
|                      | 2.50                        |      |        |        |      |                         |                         |                                           |                                                                |                          |            |
|                      | 5.00                        |      |        |        |      |                         |                         |                                           |                                                                |                          |            |
|                      | 10.00                       |      |        |        |      |                         |                         |                                           |                                                                |                          |            |
|                      | 20.00                       |      |        |        |      |                         |                         |                                           |                                                                |                          |            |
|                      | 40.00                       |      |        |        |      |                         |                         |                                           |                                                                |                          |            |
| Glucose              | 5.34                        | BA   | 1.25   |        | 5.00 | Yes                     | Yes                     | 16.70                                     | 89.09                                                          | -                        | [25]       |
|                      |                             |      |        |        |      |                         |                         |                                           |                                                                |                          |            |
|                      |                             |      |        |        |      |                         |                         |                                           |                                                                |                          |            |
|                      | 0.96                        |      |        |        |      |                         |                         |                                           |                                                                |                          |            |
|                      |                             |      |        |        |      |                         |                         |                                           |                                                                |                          |            |
|                      |                             |      |        |        |      |                         |                         |                                           |                                                                |                          |            |
| Sorghum extract      | 3.20                        | BA   | 0.50   |        | 5.00 | Yes                     | Yes                     | 19.96                                     | 159.75                                                         | -                        |            |
|                      | 3.20                        |      | 0.50   |        |      |                         |                         | 4.76                                      | 38.06                                                          | -                        |            |
| Sorghum stalks       |                             |      |        |        |      |                         |                         | 5.74                                      | 45.93                                                          | -                        |            |
| Sorghum residues     |                             |      |        |        |      |                         |                         | 4.72                                      | 37.76                                                          | -                        |            |
| D-Glucose            | 5.34                        | BA   | 3.00   |        | 5.00 | Yes                     | Yes                     | 21.86                                     | 48.60                                                          | -                        |            |
| Cellobiose           |                             |      |        |        |      |                         |                         | 23.33                                     | 51.86                                                          | -                        |            |
| D-xylose             |                             |      |        |        |      |                         |                         | 19.68                                     | 43.74                                                          | -                        |            |
| L-arabinose          |                             |      |        |        |      |                         |                         | 19.96                                     | 44.38                                                          | -                        |            |
| D-arabinose          |                             |      |        |        |      |                         |                         | 13.69                                     | 30.43                                                          | -                        |            |
| Glucose +Biomass     | 23.47                       | CN   | 1.75   |        | 5.00 | Yes                     | Yes                     | 9.00                                      | 88.03                                                          | 50.00                    |            |

| Waste composition             | Operating parameters        |      |        |        |      |                         |                         | Process performance parameters            |                                                                |                          | References |
|-------------------------------|-----------------------------|------|--------|--------|------|-------------------------|-------------------------|-------------------------------------------|----------------------------------------------------------------|--------------------------|------------|
|                               | tCOD (g COD <sup>-1</sup> ) | Mode | RT (d) | T (°C) | pH   | Substrate pre-treatment | Methanogens' inhibition | Hydrogen yield (% COD COD <sup>-1</sup> ) | Hydrogen production rate (mg l <sup>-1</sup> d <sup>-1</sup> ) | Hydrogen content (% v/v) |            |
| Glucose +Biomass              | 23.47                       | CN   | 1.50   | 37     | 5.00 | Yes                     | Yes                     | 4.00                                      | 39.12                                                          | 39.00                    | [25]       |
|                               |                             |      | 1.00   |        |      |                         |                         | 5.00                                      | 48.90                                                          | 42.00                    |            |
| Pre-treated vinegar           | 29.80                       | BA   | 1.00   | 37     | 6.00 |                         |                         | 4.00                                      | 149.04                                                         | 62.00                    | [26]       |
|                               |                             |      |        |        |      |                         |                         | 3.00                                      | 111.63                                                         | 58.00                    |            |
|                               |                             |      |        |        |      |                         |                         | 3.42                                      | 127.24                                                         | 57.00                    |            |
|                               |                             |      |        |        |      |                         |                         |                                           |                                                                |                          |            |
| Hydrolysed waste ground wheat | 4.41                        | BA   | 3.96   | 37     | 6.50 | Yes                     | Yes                     | 8.71                                      | 12.13                                                          | -                        | [27]       |
|                               | 8.59                        |      |        |        |      |                         |                         | 4.92                                      | 13.34                                                          | -                        |            |
|                               | 11.30                       |      |        |        |      |                         |                         | 5.36                                      | 19.12                                                          | -                        |            |
|                               | 16.95                       |      |        |        |      |                         |                         | 3.72                                      | 19.90                                                          | -                        |            |
|                               | 24.86                       |      |        |        |      |                         |                         | 2.26                                      | 17.74                                                          | -                        |            |
|                               | 31.19                       | BA   |        |        |      | Yes                     | Yes                     | 8.71                                      | 85.82                                                          | -                        |            |
|                               | 7.80                        |      | 2.92   | 37     | 6.50 |                         |                         | 12.04                                     | 40.24                                                          | -                        |            |
|                               | 8.14                        |      |        |        |      |                         |                         | 9.19                                      | 32.04                                                          | -                        |            |
|                               | 8.25                        |      |        |        |      |                         |                         | 8.71                                      | 30.81                                                          | -                        |            |
|                               | 8.59                        |      |        |        |      |                         |                         | 9.03                                      | 33.24                                                          | -                        |            |
|                               | 8.36                        |      |        |        |      |                         |                         | 11.57                                     | 41.45                                                          | -                        |            |
|                               | 8.02                        |      |        |        |      |                         |                         | 9.74                                      | 33.50                                                          | -                        |            |
|                               |                             |      |        |        |      |                         |                         |                                           |                                                                |                          |            |
|                               |                             |      |        |        |      |                         |                         |                                           |                                                                |                          |            |
|                               |                             |      |        |        |      |                         |                         |                                           |                                                                |                          |            |
| Brewery plant wastewater      | 22.60                       | BA   | 1.38   | 35     | 5.5  | No                      | Yes                     | 6.63                                      | 136.12                                                         | 53.39                    | [28]       |
|                               | 33.90                       |      | 1.13   |        |      |                         |                         | 8.27                                      | 311.60                                                         | 52.91                    |            |
|                               | 45.20                       |      | 0.96   |        |      |                         |                         | 7.68                                      | 452.59                                                         | 56.59                    |            |
|                               | 67.80                       |      | 1.13   |        |      |                         |                         | 9.92                                      | 747.32                                                         | 51.93                    |            |
|                               | 113.00                      |      | 3.04   |        |      |                         |                         | 5.76                                      | 267.62                                                         | 54.80                    |            |

| Operating parameters      |                             |      |        |        |       |                         |                         | Process performance parameters            |                                                                |                          | References |
|---------------------------|-----------------------------|------|--------|--------|-------|-------------------------|-------------------------|-------------------------------------------|----------------------------------------------------------------|--------------------------|------------|
| Waste composition         | tCOD (g COD <sup>-1</sup> ) | Mode | RT (d) | T (°C) | pH    | Substrate pre-treatment | Methanogens' inhibition | Hydrogen yield (% COD COD <sup>-1</sup> ) | Hydrogen production rate (mg l <sup>-1</sup> d <sup>-1</sup> ) | Hydrogen content (% v/v) |            |
| Brewery plant wastewater  | 22.60                       | BA   | 1.17   | 35     | 5     | No                      | Yes                     | 5.47                                      | 132.41                                                         | 52.53                    | [28]       |
|                           |                             |      | 0.96   |        | 5.50  |                         |                         | 15.35                                     | 452.59                                                         | 56.59                    |            |
|                           |                             |      | 1.00   |        | 6.00  |                         |                         | 7.99                                      | 225.78                                                         | 53.90                    |            |
|                           |                             |      | 0.83   |        | 6.50  |                         |                         | 3.89                                      | 131.90                                                         | 30.33                    |            |
|                           |                             |      | 7.00   |        |       |                         |                         | 0.11                                      | 3.57                                                           | 12.50                    |            |
| Medium containing sucrose | 8.42                        | BA   | 5.00   | 35     | 5.50  | No                      | No                      | 5.72                                      | 12.04                                                          | -                        | [29]       |
|                           |                             |      |        |        | 3.00  |                         |                         | 6.85                                      | 14.41                                                          | -                        |            |
|                           |                             |      |        |        | 10.00 |                         |                         | 3.18                                      | 6.70                                                           | -                        |            |
|                           |                             |      |        |        | 5.50  |                         |                         | 10.70                                     | 22.50                                                          | -                        |            |
|                           |                             |      |        |        |       |                         |                         |                                           |                                                                |                          |            |
|                           | 8.42                        | BA   | 5.00   | 35     | 5.50  | No                      | Yes                     | 11.67                                     | 24.55                                                          | -                        |            |
|                           |                             |      |        |        |       |                         |                         | 12.46                                     | 26.22                                                          | -                        |            |
|                           |                             |      |        |        |       |                         |                         | 11.43                                     | 24.04                                                          | -                        |            |
|                           | 8.42                        | BA   | 5.00   | 35     | 5.50  | No                      | No                      | 7.03                                      | 14.78                                                          | -                        |            |
|                           |                             |      |        |        |       |                         |                         | 8.22                                      | 17.30                                                          | -                        |            |
|                           |                             |      |        |        |       |                         |                         | 13.53                                     | 28.45                                                          | -                        |            |
|                           |                             |      |        |        |       |                         |                         | 8.22                                      | 17.30                                                          | -                        |            |
|                           |                             |      |        |        |       |                         |                         | 8.04                                      | 16.92                                                          | -                        |            |
|                           |                             |      |        |        |       |                         |                         | 5.33                                      | 11.20                                                          | -                        |            |
|                           |                             |      |        |        |       |                         |                         | 10.08                                     | 21.20                                                          | -                        |            |
|                           | 2.81                        | BA   | 5.00   | 35     | 5.50  | No                      | No                      | 16.35                                     | 11.47                                                          | -                        |            |
|                           | 5.61                        |      |        |        |       |                         |                         | 16.35                                     | 22.94                                                          | -                        |            |

| Operating parameters   |                             |       |        |        |        |                         |                         | Process performance parameters            |                                                                |                          | References |
|------------------------|-----------------------------|-------|--------|--------|--------|-------------------------|-------------------------|-------------------------------------------|----------------------------------------------------------------|--------------------------|------------|
| Waste composition      | tCOD (g COD <sup>-1</sup> ) | Mode  | RT (d) | T (°C) | pH     | Substrate pre-treatment | Methanogens' inhibition | Hydrogen yield (% COD COD <sup>-1</sup> ) | Hydrogen production rate (mg l <sup>-1</sup> d <sup>-1</sup> ) | Hydrogen content (% v/v) |            |
| Lactate wastewater     | 21.50                       | BA    | 2.92   | 35     | 6.50   | No                      | Yes                     | 1.27                                      | 11.68                                                          | 39.72                    | [30]       |
|                        |                             |       |        |        | 7.50   |                         |                         | 1.90                                      | 17.52                                                          | 39.72                    |            |
|                        |                             |       | 8.33   | 45     | 8.50   |                         |                         | 1.11                                      | 10.22                                                          | 30.84                    |            |
|                        |                             |       |        |        | 6.50   |                         |                         | 3.96                                      | 12.77                                                          | 50.93                    |            |
|                        |                             |       |        |        | 7.50   |                         |                         | 13.47                                     | 43.43                                                          | 53.27                    |            |
|                        |                             |       |        |        | 8.50   |                         |                         | 12.20                                     | 39.34                                                          | 70.56                    |            |
| Sucrose                | 168.30                      | BA    | 6.67   | 37     | 4.50   | No                      | Yes                     | 13.29                                     | 419.41                                                         | 4000                     | [31]       |
|                        |                             |       |        |        | 5.00   |                         |                         | 12.17                                     | 383.94                                                         | 40.00                    |            |
|                        |                             |       |        |        | 5.50   |                         |                         | 11.51                                     | 363.06                                                         | 40.00                    |            |
|                        |                             |       |        |        | 6.00   |                         |                         | 10.66                                     | 336.33                                                         | 40.00                    |            |
|                        |                             |       |        |        | 6.50   |                         |                         | 9.16                                      | 289.18                                                         | 40.00                    |            |
|                        |                             |       |        |        | Starch |                         |                         | 11.30                                     |                                                                |                          |            |
| 5.00                   | 6.92                        | 14.66 | 40.00  |        |        |                         |                         |                                           |                                                                |                          |            |
| 5.50                   | 6.34                        | 13.43 | 40.00  |        |        |                         |                         |                                           |                                                                |                          |            |
| 6.00                   | 5.81                        | 12.32 | 40.00  |        |        |                         |                         |                                           |                                                                |                          |            |
| 6.50                   | 3.99                        | 8.46  | 40.00  |        |        |                         |                         |                                           |                                                                |                          |            |
| Citric acid wastewater | 18.00                       | CN    | 48.00  | 37     |        | 7.00                    | No                      |                                           |                                                                |                          | No         |
|                        |                             |       | 32.00  |        | 4.75   |                         |                         | 490.00                                    | 67.17                                                          |                          |            |
|                        |                             |       | 24.00  |        | 5.70   |                         |                         | 560.00                                    | 63.16                                                          |                          |            |
|                        |                             |       | 12.00  |        | 6.65   |                         |                         | 690.00                                    | 65.91                                                          |                          |            |
|                        |                             |       | 10.00  |        | 3.88   |                         |                         | 490.00                                    | 65.91                                                          |                          |            |
|                        |                             |       | 8.00   |        | 3.49   |                         |                         | 330.00                                    | 67.17                                                          |                          |            |

| Operating parameters |                |      |        |        |      |                         |                         | Process performance parameters            |                                                                |                          | References |
|----------------------|----------------|------|--------|--------|------|-------------------------|-------------------------|-------------------------------------------|----------------------------------------------------------------|--------------------------|------------|
| Waste composition    | tCOD (g COD-1) | Mode | RT (d) | T (°C) | pH   | Substrate pre-treatment | Methanogens' inhibition | Hydrogen yield (% COD COD <sup>-1</sup> ) | Hydrogen production rate (mg l <sup>-1</sup> d <sup>-1</sup> ) | Hydrogen content (% v/v) |            |
| Condensed molasses   | 40.00          | CN   | 12.00  | 35     | 5.50 | No                      | Yes                     | 10.41                                     | 800.00                                                         | -                        | [33]       |
|                      |                |      | 8.00   |        |      |                         |                         | 6.63                                      | 800.00                                                         | -                        |            |
|                      |                |      | 6.00   |        | 5.50 | No                      | Yes                     | 6.17                                      | 600.00                                                         | -                        |            |
|                      |                |      | 4.00   |        |      |                         |                         | 4.74                                      | 400.00                                                         | -                        |            |
|                      |                |      | 3.00   |        |      |                         |                         | 4.28                                      | 300.00                                                         | -                        |            |
| Cellulose cellobiose | 5.92           | BA   | 2.50   | 60     | 5.60 | No                      | Yes                     | 14.26                                     | 42.21                                                          | -                        | [34]       |
| Sucrose              | 22.44          |      | 0.67   |        | 6.25 |                         |                         | 21.01                                     | 20.00                                                          | -                        | [35]       |
| Glucose              | 11.30          | BA   | 0.83   | 35     | 6.50 | No                      | Yes                     | 4.83                                      | 81.91                                                          | -                        | [36]       |
| Waste potato starch  | 11.30          |      |        |        |      |                         |                         | 8.79                                      | 149.05                                                         | -                        |            |
| Molasses             | 25.43          |      |        |        |      |                         |                         | 9.66                                      | 368.59                                                         | -                        |            |
| Glucose              | 11.30          |      |        |        |      |                         |                         | 4.04                                      | 68.48                                                          | -                        |            |
| Cellulose            | 118.40         | BA   | 6.67   | 80     | 7.50 | Yes                     | No                      | 14.00                                     | 310.70                                                         | 6.1                      | [37]       |
|                      |                |      |        |        |      |                         |                         | 10.74                                     | 238.40                                                         | 22.7                     |            |
|                      |                |      |        |        |      |                         |                         | 8.36                                      | 185.64                                                         | 24.9                     |            |
|                      |                |      |        |        |      |                         |                         | 10.74                                     | 238.40                                                         | 36.1                     |            |
|                      |                |      |        |        |      |                         |                         | 19.36                                     | 429.89                                                         | 36.1                     |            |
| Distillery effluent  | 101.00         | BA   | 1.67   | 37     | 7.00 | No                      | Yes                     | 1.75                                      | 356.67                                                         | -                        | [38]       |
|                      | 10.67          |      |        |        |      |                         |                         | 10.30                                     | 82.80                                                          | -                        |            |
|                      |                |      |        |        |      |                         |                         | 11.80                                     | 166.00                                                         | -                        |            |
|                      |                |      |        |        |      |                         |                         | 12.83                                     | 179.40                                                         | -                        |            |

| Operating parameters    |                              |      |        |        |      |                         |                         | Process performance parameters            |                                                                |                          | References |
|-------------------------|------------------------------|------|--------|--------|------|-------------------------|-------------------------|-------------------------------------------|----------------------------------------------------------------|--------------------------|------------|
| Waste composition       | tCOD (gCOD l <sup>-1</sup> ) | Mode | RT (d) | T (°C) | pH   | Substrate pre-treatment | Methanogens' inhibition | Hydrogen yield (% COD COD <sup>-1</sup> ) | Hydrogen production rate (mg l <sup>-1</sup> d <sup>-1</sup> ) | Hydrogen content (% v/v) |            |
| Distillery effluent     | 10.67                        | BA   | 1.00   | 37     | 7.00 | No                      | Yes                     | 13.07                                     | 184.00                                                         | -                        | [38]       |
| Rice slurry             | 5.86                         | BA   | 16.67  | 37     | 4.00 | No                      | Yes                     | 9.76                                      | 5.50                                                           | -                        | [39]       |
|                         |                              |      |        |        | 4.50 |                         |                         | 15.92                                     | 8.98                                                           | -                        |            |
|                         |                              |      |        |        | 5.00 |                         |                         | 15.46                                     | 8.70                                                           | -                        |            |
|                         |                              |      |        |        | 5.50 |                         |                         | 13.81                                     | 7.79                                                           | -                        |            |
|                         |                              |      |        |        | 6.00 |                         |                         | 12.15                                     | 6.91                                                           | -                        |            |
|                         |                              |      |        |        | 6.50 |                         |                         | 10.26                                     | 5.81                                                           | -                        |            |
|                         |                              |      |        |        | 7.00 |                         |                         | 7.36                                      | 4.15                                                           | -                        |            |
|                         |                              |      |        |        | 4.50 |                         |                         | 15.92                                     | 10.87                                                          | -                        |            |
|                         | 5.86                         | BA   | 16.67  | 55     | 4.50 | No                      | Yes                     | 9.13                                      | 6.60                                                           | -                        |            |
|                         | 2.86                         | BA   | 16.67  | 37     | 4.50 | No                      | Yes                     | 12.79                                     | 3.61                                                           | -                        |            |
|                         | 5.86                         |      |        |        |      |                         |                         | 15.92                                     | 8.98                                                           | -                        |            |
|                         | 8.84                         |      |        |        |      |                         |                         | 11.23                                     | 9.49                                                           | -                        |            |
|                         | 11.72                        |      |        |        |      |                         |                         | 8.10                                      | 9.14                                                           | -                        |            |
|                         | 14.70                        |      |        |        |      |                         |                         | 7.23                                      | 10.21                                                          | -                        |            |
|                         | 23.54                        |      |        |        |      |                         |                         | 7.09                                      | 16.02                                                          | -                        |            |
| Wheat starch            | 8.48                         | CN   | 0.75   | 35     | 4.50 | Yes                     | Yes                     | 1.79                                      | 25.31                                                          | -                        | [40]       |
| Wheat starch co-product |                              | BA   | 1.67   |        |      |                         |                         | 1.60                                      | 10.19                                                          | -                        |            |
| Lactose                 | 5.62                         | BA   | 2.08   | 37     | 7.50 | Yes                     | Yes                     | 15.01                                     | 451.20                                                         | 50                       | [41]       |
| Cheese whey protein     | 17.40                        |      |        |        | 6.00 |                         |                         | 12.93                                     | 388.80                                                         | 50                       |            |
| Glucose                 | 5.34                         | BA   | 2.08   | 37     | 7.50 | Yes                     | Yes                     | 11.57                                     | 37.02                                                          | 50                       |            |

| Operating parameters          |                             |      |        |        |      |                         |                         | Process performance parameters            |                                                                |                          | References |
|-------------------------------|-----------------------------|------|--------|--------|------|-------------------------|-------------------------|-------------------------------------------|----------------------------------------------------------------|--------------------------|------------|
| Waste composition             | tCOD (g COD <sup>-1</sup> ) | Mode | RT (d) | T (°C) | pH   | Substrate pre-treatment | Methanogens' inhibition | Hydrogen yield (% COD COD <sup>-1</sup> ) | Hydrogen production rate (mg l <sup>-1</sup> d <sup>-1</sup> ) | Hydrogen content (% v/v) |            |
| Wastewater sludge             | 27.00                       | BA   | 4.17   | 35     | 6.00 | No                      | Yes                     | 1.04                                      | 8.42                                                           | -                        | [42]       |
|                               | 26.20                       |      |        |        | 6.00 | Yes                     |                         | 1.36                                      | 10.69                                                          | -                        |            |
|                               | 24.00                       |      |        |        | 4.00 | Yes                     |                         | 1.28                                      | 9.22                                                           | -                        |            |
|                               | 25.20                       |      |        |        | 6.00 |                         |                         | 0.48                                      | 3.63                                                           | -                        |            |
|                               | 30.00                       |      |        |        |      |                         |                         | 2.72                                      | 24.48                                                          | -                        |            |
|                               | 25.60                       |      |        |        |      |                         |                         | 3.60                                      | 27.65                                                          | -                        |            |
|                               |                             |      |        |        |      |                         |                         |                                           |                                                                |                          |            |
| Sucrose-containing wastewater | 5.48                        | CN   | 4.78   | 26     | 5.50 | No                      | No                      | 12.19                                     | 17.47                                                          | 67.35                    | [43]       |
|                               | 8.07                        |      | 7.25   |        |      |                         |                         | 12.77                                     | 17.77                                                          | 64.29                    |            |
|                               | 11.94                       |      | 10.72  |        |      |                         |                         | 13.35                                     | 18.60                                                          | 64.29                    |            |
|                               | 16.31                       |      | 14.49  |        |      |                         |                         | 15.68                                     | 22.05                                                          | 65.31                    |            |
|                               | 20.36                       |      | 18.16  |        |      |                         |                         | 13.93                                     | 19.53                                                          | 63.27                    |            |
|                               | 34.06                       |      | 30.29  |        |      |                         |                         | 10.45                                     | 14.69                                                          | 57.14                    |            |
| Soybean straw                 | 10.00                       | BA   | 2.92   | 35     | 7.00 | No                      | Yes                     | 0.39                                      | 1.68                                                           | -                        | [44]       |
|                               |                             |      |        |        |      | Yes                     |                         | 0.73                                      | 3.12                                                           | -                        |            |
|                               |                             |      |        |        |      |                         |                         | 1.05                                      | 4.52                                                           | -                        |            |
|                               |                             |      |        |        |      |                         |                         | 1.42                                      | 6.10                                                           | -                        |            |
|                               |                             |      |        |        |      |                         |                         | 2.01                                      | 8.61                                                           | -                        |            |
|                               |                             |      |        |        |      |                         |                         | 1.72                                      | 7.37                                                           | -                        |            |
|                               |                             |      |        |        |      |                         |                         |                                           |                                                                |                          |            |
|                               | 10.00                       | BA   | 2.29   | 35     | 7.00 | No                      | Yes                     | 0.23                                      | 1.26                                                           | -                        |            |
|                               |                             |      |        |        |      | Yes                     |                         | 0.44                                      | 2.41                                                           | -                        |            |
|                               |                             |      |        |        |      |                         |                         | 0.42                                      | 2.30                                                           | -                        |            |
|                               |                             |      |        |        |      |                         |                         | 0.32                                      | 1.75                                                           | -                        |            |
|                               |                             |      |        |        |      |                         |                         | 0.28                                      | 1.52                                                           | -                        |            |
|                               |                             |      |        |        |      |                         |                         | 0.13                                      | 0.72                                                           | -                        |            |
|                               |                             |      |        |        |      |                         |                         |                                           |                                                                |                          |            |

| Operating parameters |                             |      |        |        |      |                         |                         | Process performance parameters            |                                                                |                          | References |
|----------------------|-----------------------------|------|--------|--------|------|-------------------------|-------------------------|-------------------------------------------|----------------------------------------------------------------|--------------------------|------------|
| Waste composition    | tCOD (g COD <sup>-1</sup> ) | Mode | RT (d) | T (°C) | pH   | Substrate pre-treatment | Methanogens' inhibition | Hydrogen yield (% COD COD <sup>-1</sup> ) | Hydrogen production rate (mg l <sup>-1</sup> d <sup>-1</sup> ) | Hydrogen content (% v/v) |            |
| Soybean straw        | 12.50                       | BA   | 1.54   | 35     | 7.00 | Yes                     | Yes                     | 0.07                                      | 0.75                                                           | -                        |            |
|                      | 11.13                       |      |        |        |      |                         |                         | 0.12                                      | 1.08                                                           | -                        |            |
|                      | 10.00                       |      |        |        |      |                         |                         | 0.19                                      | 1.53                                                           | -                        |            |
|                      | 10.38                       |      |        |        |      |                         |                         | 0.26                                      | 2.20                                                           | -                        |            |
|                      | 10.00                       |      |        |        |      |                         |                         | 0.59                                      | 4.78                                                           | -                        |            |
|                      | 9.88                        |      |        |        |      |                         |                         | 0.97                                      | 7.76                                                           | -                        |            |
|                      | 8.50                        |      |        |        |      |                         |                         | 0.76                                      | 5.24                                                           | -                        |            |
|                      | 10.50                       | BA   | 1.79   | 35     | 7.00 | Yes                     | Yes                     | 0.33                                      | 2.39                                                           | -                        |            |
|                      | 10.38                       |      |        |        |      |                         |                         | 0.41                                      | 2.96                                                           | -                        |            |
|                      |                             |      |        |        |      |                         |                         | 0.48                                      | 3.47                                                           | -                        |            |
|                      | 10.50                       |      |        |        |      |                         |                         | 0.29                                      | 2.12                                                           | -                        |            |
|                      | 10.63                       |      |        |        |      |                         |                         | 0.03                                      | 0.23                                                           | -                        |            |
|                      | 10.13                       |      |        |        |      |                         |                         | 1.73                                      | 12.21                                                          | -                        |            |
|                      | 10.00                       |      |        |        |      |                         |                         | 0.73                                      | 5.11                                                           | -                        |            |
|                      |                             |      |        |        |      |                         |                         | 0.04                                      | 0.30                                                           | -                        |            |
|                      |                             |      |        |        |      |                         |                         | 0.04                                      | 0.28                                                           | -                        |            |
|                      |                             |      |        |        |      |                         |                         | 0.05                                      | 0.37                                                           | -                        |            |
| Synthetic wastewater | 21.34                       | BA   | 1.25   | 35     | 6.20 | No                      | No                      | 10.55                                     | 225.15                                                         | 0.00                     | [45]       |
|                      |                             |      |        |        |      |                         | Yes                     | 15.66                                     | 334.24                                                         | 55.00                    |            |
|                      |                             |      |        |        |      |                         |                         | 16.11                                     | 343.89                                                         | 51.00                    |            |
|                      |                             |      |        |        |      |                         |                         | 12.19                                     | 260.09                                                         | 61.00                    |            |
|                      |                             |      |        |        |      |                         |                         | 10.00                                     | 213.45                                                         | 56.00                    |            |

| Operating parameters |                             |      |        |        |      |                         |                         | Process performance parameters            |                                                                |                          | References |      |     |     |      |      |   |      |
|----------------------|-----------------------------|------|--------|--------|------|-------------------------|-------------------------|-------------------------------------------|----------------------------------------------------------------|--------------------------|------------|------|-----|-----|------|------|---|------|
| Waste composition    | tCOD (g COD <sup>-1</sup> ) | Mode | RT (d) | T (°C) | pH   | Substrate pre-treatment | Methanogens' inhibition | Hydrogen yield (% COD COD <sup>-1</sup> ) | Hydrogen production rate (mg l <sup>-1</sup> d <sup>-1</sup> ) | Hydrogen content (% v/v) |            |      |     |     |      |      |   |      |
| Synthetic wastewater | 21.34                       | BA   | 1.25   | 35     | 6.20 | No                      | Yes                     | 9.68                                      | 206.49                                                         | 60.00                    | [45]       |      |     |     |      |      |   |      |
|                      |                             |      |        |        |      |                         |                         | 9.96                                      | 212.50                                                         | 56.00                    |            |      |     |     |      |      |   |      |
|                      |                             |      |        |        |      |                         | No                      | 14.63                                     | 312.11                                                         | 46.00                    |            |      |     |     |      |      |   |      |
|                      |                             |      |        |        |      |                         |                         | 15.41                                     | 328.87                                                         | 47.00                    |            |      |     |     |      |      |   |      |
|                      |                             |      |        |        |      |                         | Yes                     | 15.023                                    | 320.64                                                         | 50.00                    |            |      |     |     |      |      |   |      |
|                      |                             |      |        |        |      |                         |                         | 14.13                                     | 301.51                                                         | 67.00                    |            |      |     |     |      |      |   |      |
|                      |                             |      |        |        |      |                         |                         | 13.85                                     | 295.66                                                         | 61.00                    |            |      |     |     |      |      |   |      |
|                      |                             |      |        |        |      |                         |                         | 14.37                                     | 306.57                                                         | 62.00                    |            |      |     |     |      |      |   |      |
| Sugarcane bagasse    | 10.67                       | BA   | 13.75  | 37     | 4.50 | Yes                     | Yes                     | 0.77                                      | 0.75                                                           | -                        | [46]       |      |     |     |      |      |   |      |
|                      |                             |      |        |        |      |                         |                         | 5.00                                      | 0.92                                                           | 0.89                     |            | -    |     |     |      |      |   |      |
|                      |                             |      |        |        |      |                         |                         | 5.50                                      | 0.90                                                           | 0.87                     |            | -    |     |     |      |      |   |      |
|                      |                             |      |        |        |      |                         |                         | 6.00                                      | 0.89                                                           | 0.87                     |            | -    |     |     |      |      |   |      |
|                      |                             |      |        |        |      |                         |                         | 6.50                                      | 2.34                                                           | 2.27                     |            | -    |     |     |      |      |   |      |
|                      |                             |      |        |        |      |                         |                         | 7.00                                      | 0.85                                                           | 0.83                     |            | -    |     |     |      |      |   |      |
|                      |                             |      |        |        |      |                         |                         | 8.00                                      | 1.24                                                           | 1.20                     |            | -    |     |     |      |      |   |      |
|                      |                             |      |        |        |      |                         |                         | 9.00                                      | 2.03                                                           | 1.96                     |            | -    |     |     |      |      |   |      |
|                      | 6.46                        | BA   | 13.75  | 37     | 6.50 | Yes                     | Yes                     | 5.43                                      | 3.19                                                           | -                        |            |      |     |     |      |      |   |      |
|                      | 11.70                       |      |        |        |      |                         |                         | 6.03                                      | 6.41                                                           | -                        |            |      |     |     |      |      |   |      |
|                      | 27.54                       |      |        |        |      |                         |                         | 2.05                                      | 5.12                                                           | -                        |            |      |     |     |      |      |   |      |
|                      | 36.45                       |      |        |        |      |                         |                         | 1.50                                      | 4.96                                                           | -                        |            |      |     |     |      |      |   |      |
|                      | 47.18                       |      |        |        |      |                         |                         | 0.72                                      | 3.08                                                           | -                        |            |      |     |     |      |      |   |      |
|                      | 59.20                       |      |        |        |      |                         |                         | 2.54                                      | 69.40                                                          | -                        |            |      |     |     |      |      |   |      |
|                      | Poplar leaves               |      |        |        |      |                         |                         | 33.60                                     | BA                                                             | 10.00                    | 55         | 6.50 | Yes | No  | 0.28 | 1.18 | - | [48] |
|                      | Rice straw                  |      |        |        |      |                         |                         |                                           |                                                                |                          |            |      | No  | Yes | 0.38 | 1.58 | - |      |

| Operating parameters                      |                                     |      |        |        |      |                         |                         | Process performance parameters            |                                                                |                          | References |
|-------------------------------------------|-------------------------------------|------|--------|--------|------|-------------------------|-------------------------|-------------------------------------------|----------------------------------------------------------------|--------------------------|------------|
| Waste composition                         | tCOD (g COD <sup>-1</sup> )         | Mode | RT (d) | T (°C) | pH   | Substrate pre-treatment | Methanogens' inhibition | Hydrogen yield (% COD COD <sup>-1</sup> ) | Hydrogen production rate (mg l <sup>-1</sup> d <sup>-1</sup> ) | Hydrogen content (% v/v) |            |
| Rice straw                                | 33.60                               | BA   | 10.00  | 55     | 6.50 | No                      | No                      | 0.06                                      | 0.245                                                          | -                        | [48]       |
|                                           |                                     |      |        |        |      |                         | Yes                     | 0.26                                      | 1.11                                                           | -                        |            |
|                                           |                                     |      |        |        |      |                         | No                      | 0.09                                      | 0.38                                                           | -                        |            |
|                                           |                                     |      |        |        |      |                         | Yes                     | 0.12                                      | 0.49                                                           | -                        |            |
|                                           |                                     |      |        |        |      |                         |                         | 0.38                                      | 1.58                                                           | -                        |            |
|                                           | 67.20<br>100.80<br>134.40<br>100.80 | BA   | 10.00  | 55     | 6.50 | No                      | Yes                     | 1.50                                      | 12.56                                                          | -                        |            |
|                                           |                                     |      |        |        |      |                         |                         | 1.32                                      | 16.57                                                          | -                        |            |
|                                           |                                     |      |        |        |      |                         |                         | 0.90                                      | 15.06                                                          | -                        |            |
|                                           |                                     |      |        |        |      |                         |                         | 0.46                                      | 0.51                                                           | 64.00                    |            |
|                                           |                                     |      |        |        |      |                         |                         | 0.37                                      | 0.55                                                           | 45.00                    |            |
| Sucrose                                   | 10.67<br>21.34                      | CN   | 12.00  | 35     | 5.20 | No                      | Yes                     | 11.95                                     | 13.29                                                          | 60.10                    | [49]       |
|                                           |                                     |      |        |        |      |                         |                         | 10.88                                     | 24.18                                                          | 57.70                    |            |
|                                           |                                     |      |        |        |      |                         |                         |                                           |                                                                |                          |            |
|                                           |                                     |      |        |        |      |                         |                         |                                           |                                                                |                          |            |
|                                           |                                     |      |        |        |      |                         |                         |                                           |                                                                |                          |            |
| Food waste                                | 27.00                               | BA   | 3.33   | 30     | 5.20 | No                      | Yes                     | 9.05                                      | 91.67                                                          | -                        | [50]       |
|                                           |                                     |      |        |        |      |                         |                         |                                           |                                                                |                          |            |
| Food waste and sewage sludge              | 56.10                               |      | 2.08   | 35     | 6.00 |                         |                         | 8.41                                      | 283.13                                                         | -                        | [51]       |
|                                           |                                     |      |        |        |      |                         |                         |                                           |                                                                |                          |            |
| Organic fraction of municipal solid waste | 10.40<br>19.67                      | BA   | 2.08   | 37     | 7.00 | No                      | Yes                     | 4.69                                      | 29.29                                                          | 55.10                    | [52]       |
|                                           |                                     |      |        |        |      |                         |                         | 3.86                                      | 45.53                                                          | 46.80                    |            |

| Operating parameters                      |                             |      |        |        |      |                         |                         | Process performance parameters            |                                                                |                          | References |
|-------------------------------------------|-----------------------------|------|--------|--------|------|-------------------------|-------------------------|-------------------------------------------|----------------------------------------------------------------|--------------------------|------------|
| Waste composition                         | tCOD (g COD <sup>-1</sup> ) | Mode | RT (d) | T (°C) | pH   | Substrate pre-treatment | Methanogens' inhibition | Hydrogen yield (% COD COD <sup>-1</sup> ) | Hydrogen production rate (mg l <sup>-1</sup> d <sup>-1</sup> ) | Hydrogen content (% v/v) |            |
| Organic fraction of municipal solid waste | 13.80                       | BA   | 2.08   | 37     | 7.00 | No                      | Yes                     | 5.23                                      | 43.34                                                          | 45.60                    | [52]       |
|                                           | 30.13                       |      |        |        |      |                         |                         | 0.22                                      | 4.056                                                          | -                        |            |
|                                           | 66.80                       |      |        |        |      |                         |                         | 0.34                                      | 13.68                                                          | -                        |            |
|                                           | 25.33                       |      |        |        |      |                         |                         | 0.26                                      | 3.90                                                           | -                        |            |
|                                           | 74.00                       |      |        |        |      |                         |                         | 0.25                                      | 11.02                                                          | -                        |            |
|                                           | 116.00                      | BA   | 7.00   | 37     | 5.50 | No                      | Yes                     | 2.90                                      | 60.14                                                          | 70.00                    | [53]       |
|                                           | 117.00                      |      |        |        |      |                         |                         | 2.28                                      | 47.58                                                          | 55.00                    |            |
|                                           | 48.00                       |      |        |        |      |                         |                         | 2.62                                      | 22.44                                                          | 65.00                    |            |
|                                           |                             |      |        |        |      |                         |                         |                                           |                                                                |                          |            |
| Food waste and sewage sludge              | 52.00                       | BA   | 3.00   | 35     | 6.00 | No                      | Yes                     | 2.30                                      | 49.83                                                          | -                        | [54]       |
|                                           | 54.50                       |      |        |        |      |                         | No                      | 2.00                                      | 45.42                                                          | -                        |            |
|                                           | 56.50                       |      |        |        |      |                         |                         | 0.90                                      | 21.19                                                          | -                        |            |
|                                           | 31.50                       |      |        |        |      |                         | Yes                     | 4.00                                      | 52.50                                                          | -                        |            |
|                                           | 32.50                       |      |        |        |      |                         | No                      | 3.80                                      | 51.46                                                          | -                        |            |
|                                           | 34.00                       |      |        |        |      |                         |                         | 2.20                                      | 31.17                                                          | -                        |            |
|                                           | 35.00                       |      |        |        |      |                         | Yes                     | 0.20                                      | 2.92                                                           | -                        |            |
|                                           | 21.00                       |      |        |        |      |                         | No                      | 4.10                                      | 35.88                                                          | -                        |            |
|                                           | 22.00                       |      |        |        |      |                         |                         | 3.50                                      | 32.08                                                          | -                        |            |
|                                           | 22.50                       |      |        |        |      |                         |                         | 2.90                                      | 27.19                                                          | -                        |            |
|                                           | 23.50                       |      |        |        |      |                         | Yes                     | 0.60                                      | 5.88                                                           | -                        |            |
|                                           | 24.50                       |      |        |        |      |                         | No                      | 0.10                                      | 1.02                                                           | -                        |            |
|                                           | 16.50                       |      |        |        |      |                         |                         | 2.60                                      | 16.79                                                          | -                        |            |
|                                           | 16.50                       |      |        |        |      |                         |                         | 2.40                                      | 16.50                                                          | -                        |            |

| Waste composition            | Operating parameters        |      |        |        |      |                         |                         | Process performance parameters            |                                                                |                          | References |
|------------------------------|-----------------------------|------|--------|--------|------|-------------------------|-------------------------|-------------------------------------------|----------------------------------------------------------------|--------------------------|------------|
|                              | tCOD (g COD <sup>-1</sup> ) | Mode | RT (d) | T (°C) | pH   | Substrate pre-treatment | Methanogens' inhibition | Hydrogen yield (% COD COD <sup>-1</sup> ) | Hydrogen production rate (mg l <sup>-1</sup> d <sup>-1</sup> ) | Hydrogen content (% v/v) |            |
| Food waste and sewage sludge | 17.00                       | BA   | 3.00   | 35     | 6.00 | No                      | No                      | 2.40                                      | 16.50                                                          | -                        | [54]       |
|                              | 17.50                       |      |        |        |      |                         | Yes                     | 0.60                                      | 4.38                                                           | -                        |            |
|                              | 18.50                       |      |        |        |      |                         | No                      | 0.10                                      | 0.77                                                           | -                        |            |
|                              | 10.50                       |      |        |        |      |                         |                         | 2.60                                      | 11.38                                                          | -                        |            |
|                              | 11.00                       |      |        |        |      |                         |                         | 2.30                                      | 10.54                                                          | -                        |            |
|                              | 11.50                       |      |        |        |      |                         |                         | 1.50                                      | 7.19                                                           | -                        |            |
|                              | 11.50                       |      |        |        |      |                         | Yes                     | 0.60                                      | 2.88                                                           | -                        |            |
|                              | 12.00                       |      |        |        |      |                         | No                      | 0.10                                      | 0.50                                                           | -                        |            |
|                              | 5.00                        |      |        |        |      |                         |                         | 2.50                                      | 5.21                                                           | -                        |            |
|                              | 5.50                        |      |        |        |      |                         |                         | 1.30                                      | 2.98                                                           | -                        |            |
|                              | 5.50                        |      |        |        |      |                         |                         | 0.20                                      | 0.46                                                           | -                        |            |
|                              | 0.30                        |      |        |        |      |                         | No                      | 2.84                                      | 1.02                                                           | -                        |            |
| Sucrose                      | 0.60                        | BA   | 1.04   | 36     | 5.50 | No                      | No                      | 7.06                                      | 5.09                                                           | -                        | [55]       |
|                              | 1.10                        |      |        |        |      |                         |                         | 9.21                                      | 12.15                                                          | -                        |            |
|                              | 2.20                        |      |        |        |      |                         |                         | 12.74                                     | 33.63                                                          | -                        |            |
|                              | 4.50                        |      |        |        |      |                         |                         | 14.76                                     | 79.69                                                          | -                        |            |
|                              | 9.00                        |      |        |        |      |                         |                         | 11.48                                     | 123.97                                                         | -                        |            |
|                              | 17.90                       |      |        |        |      |                         |                         | 5.61                                      | 120.57                                                         | -                        |            |
|                              | 2.00                        |      |        |        |      |                         |                         | 7.38                                      | 17.71                                                          | -                        |            |
|                              | 4.00                        |      |        |        |      |                         |                         | 7.51                                      | 36.03                                                          | -                        |            |
|                              | 8.00                        |      |        |        |      |                         |                         | 7.19                                      | 69.02                                                          | -                        |            |
|                              | 16.00                       |      |        |        |      |                         |                         | 5.87                                      | 112.62                                                         | -                        |            |

| Waste composition | Operating parameters        |      |        |        |      |                         |                         | Process performance parameters            |                                                                |                          | References |
|-------------------|-----------------------------|------|--------|--------|------|-------------------------|-------------------------|-------------------------------------------|----------------------------------------------------------------|--------------------------|------------|
|                   | tCOD (g COD <sup>-1</sup> ) | Mode | RT (d) | T (°C) | pH   | Substrate pre-treatment | Methanogens' inhibition | Hydrogen yield (% COD COD <sup>-1</sup> ) | Hydrogen production rate (mg l <sup>-1</sup> d <sup>-1</sup> ) | Hydrogen content (% v/v) |            |
| Sucrose           | 32.00                       | BA   | 1.04   | 36     | 5.50 | No                      | No                      | 3.53                                      | 135.62                                                         | -                        | [55]       |
|                   | 64.00                       |      |        |        |      |                         |                         | 1.89                                      | 145.31                                                         | -                        |            |
|                   | 96.00                       |      |        |        |      |                         |                         | 1.07                                      | 123.52                                                         | -                        |            |
|                   | 1.10                        |      |        |        |      |                         |                         | 3.28                                      | 4.33                                                           | -                        |            |
|                   | 2.30                        |      |        |        |      |                         |                         | 5.42                                      | 14.97                                                          | -                        |            |
|                   | 4.60                        |      |        |        |      |                         |                         | 6.37                                      | 35.16                                                          | -                        |            |
|                   | 9.50                        |      |        |        |      |                         |                         | 3.41                                      | 38.83                                                          | -                        |            |
|                   | 16.10                       |      |        |        |      |                         |                         | 2.84                                      | 54.83                                                          | -                        |            |
|                   | 32.30                       |      |        |        |      |                         |                         | 2.33                                      | 90.45                                                          | -                        |            |

**Table S2. a.** Kendall rank analysis between tCOD (continuous operational parameter) and the process performance parameters (hydrogen yield, production rate and content).

| Parameters                                                                              | z     | p-value   | Tau-b  |
|-----------------------------------------------------------------------------------------|-------|-----------|--------|
| Yield (% COD COD <sup>-1</sup> ) and tCOD (g COD l <sup>-1</sup> )                      | -5.21 | 1.86 e-07 | -0.17  |
| Production rate (mg l <sup>-1</sup> d <sup>-1</sup> ) and tCOD (g COD l <sup>-1</sup> ) | 7.25  | 4.18 e-13 | 0.24   |
| Content (% v/v) and tCOD (g COD l <sup>-1</sup> )                                       | -0.14 | 0.88      | - 0.01 |

**Table S2. b.** Kruskal Wallis analysis between categorial parameters (pH, substrate composition, temperature, operating mode, residence time, methanogen's inhibition, substrate pre-treatment) and process performance parameters (hydrogen yield, production rate and content).

| Parameters                     | Yield (% COD COD <sup>-1</sup> ) |     |         | Production rate (mg l <sup>-1</sup> d <sup>-1</sup> ) |     |         | Content (% v/v) |    |           |
|--------------------------------|----------------------------------|-----|---------|-------------------------------------------------------|-----|---------|-----------------|----|-----------|
|                                | Chi-squared                      | df  | p-value | Chi-squared                                           | df  | p-value | Chi-squared     | df | p-value   |
| <b>pH</b>                      | 411.42                           | 383 | 0.15    | 420.11                                                | 407 | 0.32    | 132.80          | 87 | 0.001     |
| <b>Substrate composition</b>   | 413.31                           | 383 | 0.14    | 421.99                                                | 407 | 0.29    | 118.55          | 87 | 0.01      |
| <b>Temperature (°C)</b>        | 401.41                           | 383 | 0.25    | 411.71                                                | 407 | 0.43    | 57.33           | 87 | 0.99      |
| <b>Operating mode</b>          | 412.89                           | 383 | 0.14    | 422                                                   | 407 | 0.29    | 145.75          | 87 | 68.12 e-5 |
| <b>Residence time (d)</b>      | 412.89                           | 383 | 0.14    | 422                                                   | 407 | 0.29    | 131.67          | 87 | 0.001     |
| <b>Methanogen's inhibition</b> | 411.63                           | 383 | 0.15    | 422                                                   | 407 | 0.29    | 101.67          | 87 | 0.13      |
| <b>Substrate pre-treatment</b> | 413.02                           | 383 | 0.14    | 422                                                   | 407 | 0.29    | 132.65          | 87 | 0.001     |

**Table S3.** R script (RStudio 4.1.2).

|                                        |                                                                                                                                                                                                                                                                                                              |
|----------------------------------------|--------------------------------------------------------------------------------------------------------------------------------------------------------------------------------------------------------------------------------------------------------------------------------------------------------------|
| <b>#Kendall-tau (Yield and tCOD)</b>   | <pre>library(readxl) tcod=Yieldfinal &lt;- read_excel("FileLocation.xlsx", sheet = "tcod2") View(tcod) dftcod=as.data.frame(tcod) head(dftcod) ken1=cor.test(dftcod\$Y,dftcod\$tcod, method="kendall"): print(ken1)</pre>                                                                                    |
| <b>#Kruskall-Wallis (Yield and pH)</b> | <pre>library(readxl) ph=Yieldfinal &lt;- read_excel("C:/Users/ritam/Desktop/Stat article/Yieldfinal.xlsx", sheet = "PH2") View(ph) dfph=as.data.frame(ph) head(dfph) kruskal.test(Category~Y, data = dfph)</pre>                                                                                             |
| <b>#Yield multi-linear regression</b>  | <pre>library(readxl) Group1=Yieldfinal &lt;- read_excel("C:/Users/ritam/Desktop/Stat article/Yieldfinal.xlsx", sheet = "Signif") View(Group1) dfgroup1=as.data.frame(Group1) head(dfgroup1) d.fit=glm(Y~.,data = dfgroup1) summary(d.fit) coef(d.fit) corrplot(cor(dfgroup1[,1:6]),method = "ellipse")</pre> |

## References

- [1] Ueno, Y., Otsuka, S. and Morimoto, M., (1996). Hydrogen production from industrial wastewater by anaerobic microflora in chemostat culture, *Journal of Fermentation and Bioengineering*, **82** (2), pp.194-197.

- [2] Lay, C., Wu, J., Hsiao, C., Chang, J., Chen, C. and Lin, C., (2010). Biohydrogen production from soluble condensed molasses fermentation using anaerobic fermentation, *International Journal of Hydrogen Energy*; *3rd Asian Bio Hydrogen Symposium*, **35** (24), pp.13445-13451.
- [3] Ren, N., Li, J., Li, B., Wang, Y. and Liu, S., (2006). Biohydrogen production from molasses by anaerobic fermentation with a pilot-scale bioreactor system, *International Journal of Hydrogen Energy*, **31** (15), pp.2147-2157.
- [4] Yu, H., Zhu, Z., Hu, W. and Zhang, H., (2002). Hydrogen production from rice winery wastewater in an upflow anaerobic reactor by using mixed anaerobic cultures, *International Journal of Hydrogen Energy*; *BIOHYDROGEN 2002*, **27** (11), pp.1359-1365.
- [5] Lin, C. and Chang, R., (1999). Hydrogen production during the anaerobic acidogenic conversion of glucose, *Journal of Chemical Technology & Biotechnology*, **74** (6), pp.498-500.
- [6] Roychowdhury, S., Cox, D. and Levandowsky, M., (1988). Production of hydrogen by microbial fermentation, *International Journal of Hydrogen Energy*, **13** (7), pp.407-410.
- [7] Kataoka, N., Miya, A. and Kiriya, K., (1997). Studies on hydrogen production by continuous culture system of hydrogen-producing anaerobic bacteria, *Water Science and Technology*; *Anaerobic Digestion VIII*, **36** (6), pp.41-47.
- [8] Zhang, T., Liu, H. and Fang, H.H.P., (2003). Biohydrogen production from starch in wastewater under thermophilic condition, *Journal of Environmental Management*, **69** (2), pp.149-156.
- [9] Jung, K., Kim, D. and Shin, H., (2010). Continuous fermentative hydrogen production from coffee drink manufacturing wastewater by applying UASB reactor, *International Journal of Hydrogen Energy*; *3rd Asian Bio Hydrogen Symposium*, **35** (24), pp.13370-13378.
- [10] Mu, Y., Yu, H. and Wang, Y., (2006). The role of pH in the fermentative hydrogen production from an acidogenic granule-based reactor, *Chemosphere*, **64** (3), pp.350-358.
- [11] Mu, Y. and Yu, H., (2006). Biological hydrogen production in a UASB reactor with granules. I: Physicochemical characteristics of hydrogen-producing granules, *Biotechnology and Bioengineering*, **94** (5), pp.980-987.
- [12] Chang, F. and Lin, C., (2004). Biohydrogen production using an up-flow anaerobic sludge blanket reactor, *International Journal of Hydrogen Energy*, **29** (1), pp.33-39.

- [13] Yu, H. and Mu, Y., (2006). Biological hydrogen production in a UASB reactor with granules. II: Reactor performance in 3-year operation, *Biotechnology and Bioengineering*, **94** (5), pp.988-995.
- [14] Noike, T. and Mizuno, O., (2000). Hydrogen fermentation of organic municipal wastes, *Water Science and Technology*, **42** (12), pp.155-162.
- [15] Kotsopoulos, T.A., Irini,Zeng RJ FAU - Angelidaki, and Angelidaki, I., (2006). Biohydrogen production in granular up-flow anaerobic sludge blanket (UASB) reactors with mixed cultures under hyper-thermophilic temperature (70 degrees C), *Biotechnology and Bioengineering JID - 7502021*,
- [16] Arriaga, S., Rosas, I., Alatríste-Mondragón, F. and Razo-Flores, E., (2011). Continuous production of hydrogen from oat straw hydrolysate in a biotrickling filter, *Fuel and Energy Abstracts*, **36** pp.3442-3449.
- [17] Li, J., Li, B., Zhu, G., Ren, N., Bo, L. and He, J., (2007). Hydrogen production from diluted molasses by anaerobic hydrogen producing bacteria in an anaerobic baffled reactor (ABR), *International Journal of Hydrogen Energy; International Symposium on Solar-Hydrogen-Fuel Cells 2005*, **32** (15), pp.3274-3283.
- [18] Chen, C., Lin, C. and Lin, M., (2002). Acid-base enrichment enhances anaerobic hydrogen production process, *Applied Microbiology and Biotechnology*, **58** (2), pp.224-228.
- [19] Guo, W., Ren, N., Chen, Z., Liu, B., Wang, X., Xiang, W. and Ding, J., (2008). Simultaneous biohydrogen production and starch wastewater treatment in an acidogenic expanded granular sludge bed reactor by mixed culture for long-term operation, *International Journal of Hydrogen Energy*, **33** (24), pp.7397-7404.
- [20] Guo, L., Lu, M., Li, Q., Zhang, J. and She, Z., (2015). A comparison of different pretreatments on hydrogen fermentation from waste sludge by fluorescence excitation-emission matrix with regional integration analysis, *International Journal of Hydrogen Energy*, **40** (1), pp.197-208.
- [21] Arooj, M.F., Han, S., Kim, S., Kim, D. and Shin, H., (2008). Continuous biohydrogen production in a CSTR using starch as a substrate, *International Journal of Hydrogen Energy; 2nd National and 1st Latin American Congress, Hydrogen and Sustainable Energy Sources*, **33** (13), pp.3289-3294.
- [22] Chen, S., Lee, K., Lo, Y., Chen, W., Wu, J., Lin, C. and Chang, J., (2008). Batch and continuous biohydrogen production from starch hydrolysate by *Clostridium* species, *International Journal of Hydrogen Energy*, **33** (7), pp.1803-1812.
- [23] Datar, R., Huang, J., Maness, P., Mohagheghi, A., Czernik, S. and Chornet, E., (2007). Hydrogen production from the fermentation of corn stover biomass pretreated with a steam-explosion process, *International Journal of Hydrogen Energy*, **32** (8), pp.932-939.
- [24] Pattra, S., Sangyoka, S., Boonmee, M. and Reungsang, A., (2008). Bio-hydrogen production from the fermentation of sugarcane bagasse hydrolysate by *Clostridium butyricum*, *International Journal of Hydrogen Energy; 2nd Asian Bio Hydrogen Symposium*, **33** (19), pp.5256-5265.

- [25] Ntaikou, I., Gavala, H.N., Kornaros, M. and Lyberatos, G., (2008). Hydrogen production from sugars and sweet sorghum biomass using *Ruminococcus albus*, *International Journal of Hydrogen Energy*, **33** (4), pp.1153-1163.
- [26] Wang, Z., Shao, S., Zhang, C., Lu, D., Ma, H. and Ren, X., (2015). Pretreatment of vinegar residue and anaerobic sludge for enhanced hydrogen and methane production in the two-stage anaerobic system, *International Journal of Hydrogen Energy*, **40** (13), pp.4494-4501.
- [27] Sagnak, R., Kargi, F. and Kapdan, I.K., (2011). Bio-hydrogen production from acid hydrolyzed waste ground wheat by dark fermentation, *International Journal of Hydrogen Energy*; *3rd Iranian Fuel Cell Seminar*, **36** (20), pp.12803-12809.
- [28] Chu, C., Tung, L. and Lin, C., (2013). Effect of substrate concentration and pH on biohydrogen production kinetics from food industry wastewater by mixed culture, *International Journal of Hydrogen Energy*, **38** (35), pp.15849-15855.
- [29] Zhu, H. and Beland, M., (2006). Evaluation of alternative methods of preparing hydrogen producing seeds from digested wastewater sludge, *International Journal of Hydrogen Energy*, **31** (14), pp.1980-1988.
- [30] Ziara, R.M.M., Miller, D.N., Subbiah, J. and Dvorak, B.I., (2019). Lactate wastewater dark fermentation: The effect of temperature and initial pH on biohydrogen production and microbial community, *International Journal of Hydrogen Energy*, **44** (2), pp.661-673.
- [31] Khanal, S.K., Chen, W., Li, L. and Sung, S., (2004). Biological hydrogen production: effects of pH and intermediate products, *International Journal of Hydrogen Energy*, **29** (11), pp.1123-1131.
- [32] Yang, H., Shao, P., Lu, T., Shen, J., Wang, D., Xu, Z. and Yuan, X., (2006). Continuous bio-hydrogen production from citric acid wastewater via facultative anaerobic bacteria, *International Journal of Hydrogen Energy*, **31** (10), pp.1306-1313.
- [33] Chang, J., Wu, J., Wen, F., Hung, K., Chen, Y., Hsiao, C., Lin, C. and Huang, C., (2008). Molecular monitoring of microbes in a continuous hydrogen-producing system with different hydraulic retention time, *International Journal of Hydrogen Energy*; *Asian bioH<sub>2</sub> Symposium 2006*, **33** (5), pp.1579-1585.
- [34] Liu, Y., Yu, P., Song, X. and Qu, Y., (2008). Hydrogen production from cellulose by co-culture of *Clostridium thermocellum* JN4 and *Thermoanaerobacterium thermosaccharolyticum* GD17, *International Journal of Hydrogen Energy*; *2nd World Congress of Young Scientists on Hydrogen Energy Systems*, **33** (12), pp.2927-2933.
- [35] O-Thong, S., Prasertsan, P., Karakashev, D. and Angelidaki, I., (2008). Thermophilic fermentative hydrogen production by the newly isolated *Thermoanaerobacterium thermosaccharolyticum* PSU-2, *International Journal of Hydrogen Energy*, **33** (4), pp.1204-1214.

- [36] Wang, X., Jin, B. and Mulcahy, D., (2008). Impact of carbon and nitrogen sources on hydrogen production by a newly isolated *Clostridium butyricum* W5, *International Journal of Hydrogen Energy*; 2nd Asian Bio Hydrogen Symposium, **33** (19), pp.4998-5005.
- [37] Nguyen, T.D., Han, S.J., Kim, J.P., Kim, M.S., Oh, Y.K. and Sim, S.J., (2008). Hydrogen production by the hyperthermophilic eubacterium, *Thermotoga neapolitana*, using cellulose pretreated by ionic liquid, *International Journal of Hydrogen Energy*; 2nd Asian Bio Hydrogen Symposium, **33** (19), pp.5161-5168.
- [38] Vatsala, T.M., Raj, S.M. and Manimaran, A., (2008). A pilot-scale study of biohydrogen production from distillery effluent using defined bacterial co-culture, *International Journal of Hydrogen Energy*, **33** (20), pp.5404-5415.
- [39] Fang, H.H.P., Li, C. and Zhang, T., (2006). Acidophilic biohydrogen production from rice slurry, *International Journal of Hydrogen Energy*, **31** (6), pp.683-692.
- [40] Hussy, I., Hawkes, F.R., Dinsdale, R. and Hawkes, D.L., (2003). Continuous Fermentative Hydrogen Production from a Wheat Starch Co-Product by Mixed Microflora, *Biotechnology and Bioengineering*, **84** pp.619-26.
- [41] Davila-Vazquez, G., Alatrliste-Mondragón, F., de León-Rodríguez, A. and Razo-Flores, E., (2008). Fermentative hydrogen production in batch experiments using lactose, cheese whey and glucose: Influence of initial substrate concentration and pH, *International Journal of Hydrogen Energy*; 2nd Asian Bio Hydrogen Symposium, **33** (19), pp.4989-4997.
- [42] Wang, C.C., Chang, C.W., Chu, C.P., Lee, D.J., Chang, B.-. and Liao, C.S., (2003). Producing hydrogen from wastewater sludge by *Clostridium bifermentans*, *Journal of Biotechnology*, **102** (1), pp.83-92.
- [43] Liu, H. and Fang, H.H., (2002). Hydrogen production from wastewater by acidogenic granular sludge, *Water Science and Technology : A Journal of the International Association on Water Pollution Research* IJD - 9879497,
- [44] Han, H., Wei, L., Liu, B., Yang, H. and Shen, J., (2012). Optimization of biohydrogen production from soybean straw using anaerobic mixed bacteria, *International Journal of Hydrogen Energy*; 12th CHEC, **37** (17), pp.13200-13208.
- [45] Wang, Y., Ping, A., Hu, C. and Zhang, Y., (2011). Effects of various pretreatment methods of anaerobic mixed microflora on biohydrogen production and the fermentation pathway of glucose, *International Journal of Hydrogen Energy*, **36** pp.390-396.
- [46] Fangkum, A. and Reungsang, A., (2011). Biohydrogen production from sugarcane bagasse hydrolysate by elephant dung: Effects of initial pH and substrate concentration, *International Journal of Hydrogen Energy*; 4th Asian Bio-Hydrogen Symposium, **36** (14), pp.8687-8696.

- [47] Cui, M., Yuan, Z., Zhi, X., Wei, L. and Shen, J., (2010). Biohydrogen production from poplar leaves pretreated by different methods using anaerobic mixed bacteria, *International Journal of Hydrogen Energy*, **35** pp.4041-4047.
- [48] Chen, C., Chuang, Y., Lin, C., Lay, C. and Sen, B., (2012). Thermophilic dark fermentation of untreated rice straw using mixed cultures for hydrogen production, *International Journal of Hydrogen Energy; the 2011 Asian Bio-Hydrogen and Biorefinery Symposium (2011ABBS)*, **37** (20), pp.15540-15546.
- [49] Kyazze, G., Dinsdale, R., Guwy, A.J., Hawkes, F.R., Premier, G.C. and Hawkes, D.L., (2007). Performance characteristics of a two-stage dark fermentative system producing hydrogen and methane continuously, *Biotechnology and Bioengineering*, **97** (4), pp.759-770.
- [50] Sreela-or, C., Imai, T., Plangklang, P. and Reungsang, A., (2011). Optimization of key factors affecting hydrogen production from food waste by anaerobic mixed cultures, *International Journal of Hydrogen Energy; 2010 Asian/APEC BioH<sub>2</sub>*, **36** (21), pp.14120-14133.
- [51] Kim, D., Kim, S., Kim, H., Kim, M. and Shin, H., (2011). Sewage sludge addition to food waste synergistically enhances hydrogen fermentation performance, *Bioresource Technology; Special Issue : Biofuels-III: Biohydrogen*, **102** (18), pp.8501-8506.
- [52] Okamoto, M., Miyahara, T., Mizuno, O. and Noike, T., (2000). Biological hydrogen potential of materials characteristic of the organic fraction of municipal solid wastes, *Water Science and Technology*, **41** (3), pp.25-32.
- [53] Dong, L., Zhenhong, Y., Yongming, S., Xiaoying, K. and Yu, Z., (2009). Hydrogen production characteristics of the organic fraction of municipal solid wastes by anaerobic mixed culture fermentation, *International Journal of Hydrogen Energy*, **34** (2), pp.812-820.
- [54] Kim, S., Han, S. and Shin, H., (2004). Feasibility of biohydrogen production by anaerobic co-digestion of food waste and sewage sludge, *International Journal of Hydrogen Energy*, **29** (15), pp.1607-1616.
- [55] Chen, W., Chen, S., Kumar Khanal, S. and Sung, S., (2006). Kinetic study of biological hydrogen production by anaerobic fermentation, *International Journal of Hydrogen Energy*, **31** (15), pp.2170-2178.
